# Supplementary material for: Magnitude and Kinetics of T Cell and Antibody Responses During H1N1pdm09 Infection in Inbred Babraham Pigs and Outbred Pigs
Source: Front Immunol. 2021 Feb 2;11:604913. doi: 10.3389/fimmu.2020.604913 (PMC7884753; doi:10.3389/fimmu.2020.604913)
Supplement: Supplementary file 1 [file DataSheet_1.xlsx]

## Sheet: Fig 1B Viral load 
Values are PFU/ml control animals and DPI-1 time point showed 0 PFU
OB1		animal #	DPI	1	2	3	4	5	6	7	8	9	10	11	12	13
	PFU/ml	R49	1	135000
		G107	2	15000	250000
		B22	3	170000	400000	525000
		Y361	4	2000	100000	22500	25000
		B72	5	80000	120000	37500	95000	2000
		R09	6	25000	25000	35000	35000	4750	475
		B36	7	175000	100000	27500	20000	9750	325	50
		B36	9	175000	100000	27500	20000	9750	325	50		0		0
		Y397	11	40000	400000	87500	32500	82.5	750	150		0		0
		Y201	13	100000	52500	175000	77500	4750	750	0		0		0		0
			mean	91700	171944	117188	43571.4	5180.42	525	62.5		0		0		0
OB2		animal #	DPI (cull)	1	2	3	4	5	6	7	8	9	10	11	12	13
	PFU/ml	Y385	1	17500
		P349	2	37500	55000
		R146	3	80000	100000	750000
		G115	4	45000	22500	6750	10000
		R149	5		725000	400000	250000	5500
		Y283	6	65000	22500	975000	150000	10000	50
		P224	7		20000	37500	45000	375	175	0
		G116	9		30000	55000	275000	25000	1250	0
		G117	11	62500	7000	4500
		R147	13	20000	22500	105000	57500	30000	2000	0		0		0		0
			mean	51250	122750	318393	131250	14175	868.75	0		0		0		0
BM1		DPI	DPI	1	2	3	4	5	6	7	8	9	10	11	12	13
	PFU/ml	R73	1	500000
		G37	2	500000	1250
		P162	3	1250000	1750	1500
		B166	4	450000	1000	15000	37500
		P156	5	1250000	6500	3750	87500	2750
		P236	6	500000	2000	750	75000	5000	50
		G29	7	425000	10000	750	80000	5750	0	0
		B160	9	250000	10000	5000	450000	7500	50	0		0
		B08	11	250000	6500	20000	175000	2000	175	0		0		0
		P107	13	1750000	2500	15000	450000	20000	75	0		0		0		0
			mean	712500	4611.11	7718.75	193571	7166.67	70	0		0		0		0
BM2		animal #	DPI (cull)	1	2	3	4	5	6	7	8	9	10	11	12	13
	PFU/ml	R92	1	12500
		G12	2		175000
		B106	3	55000	475000	1250000
		G30	4	75000	150000	47500	150000
		Y204	5	50000	75000	1000000	1000000	100000
		R111	6	6250000	200000	175000	275000	30000	1250
		G40	7	2000	4500	50000	1000000	17500	2500	25
		G28	9	2250000	125000	500000	225000	50000	1500	0		0
		G34	11	300000	250000	475000	1000000	175000	125	0		0		0
		R97	13	12500	5250	5500	300000	40000	500	0		0		0		0
			mean	1.00078e+06	162194	437875	564286	68750	1175	6.25		0		0		0
BM3		animal #	DPI (cull)	1	2	3	4	5	6	7	8	9
	PFU/ml	O201	6	275000	2750	37500	325000	17500	25
		G39		1750000	60000	1000000	750000	1250	475
		P199		135000	750000	1250000	450000	100	1000
		G132	7	750000	175000	1500000	100000	12500	1250	0
		R140		20000000	3500	3500	40000	3250	150	0
		P345		105000	6000	57500	500000	150000	50	0
		P434	13	113000	9500	2250000	250000	150	50	0	0	0
		O433		3250000	37500	300000	150000	12500	1500	25	0	0
		G141		3000000	9750	125000	150000	2750	0	0	0	0
		R113	14	55000	9000	67500	77500	3000	0	0	0	0
		P046		200000	97500	200000	500000	3750	4250	250	0	0
		G152		1250000	77500	375000	1000000	500	1500	0	0	0
		G124	20	2000000	20000	135000	500000	6000	2000	0	0	0
		R109		450000	1750	325000	35000	6750	50	0	0	0
		P013		125000	125000	57500	27500	37500	0	0	0	0
		G140	21	150000	10000	725000	500000	7500	1500	0	0	0
		O419		1500000	52500	225000	350000	6250	100	0	0	0
		R121		1250000	45000	500000	275000	500	100	0	0	0
			mean	2.01989e+06	82902.8	507417	332222	15097.2	777.778	18.3333	0	0
In contact		animal #	DPI (cull)	1	2	3	4	5	6	7	8	9	10	11	12	13
	OB1	G104	11	50	1000	350	75	400	27500	218000
		R59	13	3750	275	82500	50000	17000	198000	65000
	OB2	P150	11	0	25	25	0	42500	32500	15000		25		0
		Y272	13	0	500	12500	40000	225000	225000	475		0		0		0
	BM3	P013	11	0	0	0	75	125	27500	5750		500		0
		P120	13	0	0	0	0	0	0	15000		350		0		0
	BM4	R06	11	0	0	50	0	0	0	2500		35000		175
		G47	13	0	0	12500	20000	500000	300000	450000		750		0		0

## Sheet: Fig 1C cell frequencies 
		OB								BM
CD8 BAL	Control	24.7	36.6	15.1	19.3	36	26.5	23.1	12.1	9.02	5.52	6.99	7.87	7.16	6.29	6.59	5.54
	1	20.4	26.4							9.98	8.87
	2	19.3	29.3							6.65	12
	3	38.6	21.9							6.54	10.2
	4	12.1	28.4							6.69	7.19
	5	15.8	20.4							11.1	8.85
	6	11.8	27.2							10.8	9.91
	7	15.5	34.1							9.77	14.8
	9	15.8	25.3							21.2	22.1
	11	8.42	34.3							20	14.5
	13	23.8	42.4							27.1	22.7
		OB								BM
CD8 Lung	control	19.2	17	13.4	15.5	21.6	18.5	15	10.2	4.65	2.73	4.12	5.22	4.16	4.63	2.33	2.36
	1	20.8	4.51							1.93	3.14
	2	18	19.4							1.8	3.49
	3	20.7	17.4							5.24	5.49
	4	9.5	19							3.47	5.19
	5	20.2	23.7							4.86	6.54
	6	17.1	13.7							5.76	5.93
	7	6.66	20.7							4.32	5.22
	9	4.21	14.3							8.87	5.35
	11		18							7.1	6.69
	13	6.29	18.6							10.2	6.17
		OB								BM
CD8 TBLN	Control	9.67	10.3	10.7	8.66	12.3	15	14.7	10.9	9.08	8.58	8.01	10.8	4.94	5.28	7.37	6.66
	1	10.4	10.1							7.84	5.2
	2	8.52	10.3							7.58	5.98
	3	7.45	13.1							11	7.76
	4	8.58	17							8.6	3.42
	5	15.2	11.9							11.6	7.76
	6	11	6.26							11.5	8.94
	7	10.5	12.1							11.2	10.4
	9	9.1	18							7.31	10.4
	11	10.8	12.9							10	11.5
	13	11.4	16.8							9.73	9.69
		OB								BM
CD8 PBMC	Control			6.38	5.18	10.5	14.7	10.6	9.04	3.57	3.44	3.22	3.96		3.17	2.31	2.7
	1	5.73	13.5							1.73	1.28
	2	12	14.3							1.72	2.78
	3	11	12.7							4.45	2.94
	4	6.2	10.2							3.69	2.11
	5	12	18.9							4.1	3.41
	6	8.97	13.6							4.48	2.94
	7	6.47	15.7							3.37	5.57
	9	7.94	9.97							5.09	2.96
	11		9.02							3.81	4.63
	13	7.25	9.2							5.07	4.76
		OB								BM
CD4 BAL	control	19	15.1	21.6	24.1	11.8	17.4	13.4	12.5	27.4	23.8	21.4	19.5	27	25.9	20.7	26.2
	1	18.5	20.9							27	23.3
	2	26.7	16.2							31	22.4
	3	17.8	20.1							31	20.1
	4	27.4	14.3							17.4	14.5
	5	26.5	21.6							23.6	19.4
	6	11.7	21							27.5	20.1
	7	19.3	17.1							31.8	19.4
	9	28.6	16							12.3	23.8
	11	18.3	13.5							17.1	18.4
	13	16.3	12.8							23.2	19.7
		OB								BM
CD4 Lung	Control	14.3	12.6	11.3	13.3	19.2	12.6	15.8	34	8.99	13.7	14.2	9.23	8.64	11.1	7.53	10.6
	1	11.6	6.63							7.47	4.3
	2	8.62	25.6							9.19	8.2
	3	10.9	15.6							10.3	7.49
	4	15.4	14.8							11.5	6
	5	9.26	18.4							10.8	6.15
	6	8.55	10.6							10.5	8.81
	7	13.3	23							10.5	8.19
	9	6.01	10.7							13.2	10
	11	4.8	21.9							7.62	8.86
	13	10.2	21.4							12.4	8.04
		OB								BM
CD4 TBLN	Control	31.5	38	44.2	39.7	38.9	37.9	34.6	45.4	47.4	55.4	50.3	47.1	40.9	48.2	47.4	48.5
	1	48.8	38.2							39.7	39.4
	2	42.2	39.3							43.8	43
	3	33.4	37.8							43.6	31.8
	4	41.5	35.2							47.1	20.9
	5	49.2	32.6							41.4	42
	6	44.3	21.4							44.6	41.2
	7	42.2	41.6							48.7	43.1
	9	43.5	44.1							48.5	47.8
	11	45.1	42.5							45.6	49.4
	13	44.8	43.9							48	48.9
		OB								BM
CD4 PBMC	Control			12.4	12.6	16.2	18.2	19.2	36.9	14	15.2	16	12.1		9.21	10.9	11.3
	1	12.4	23.7							16.1	7.49
	2	21.9	24.4							10.7	11.3
	3	14.2	18.8							14.1	7.81
	4	17.2	17.4							13.7	4.85
	5	18.4	16.3							10.7	11.3
	6	13.1	12.1							10.6	13.6
	7	25.5	29.1							13.9	15.7
	9	18.2	11.7							12.4	10.7
	11		23.4							13.7	15.3
	13	15.8	16.4							14.4	13.3
		OB								BM
gd BAL	control	29.4	22.9	29.9	26	15.3	29.5	17.4	10.5	38.1	29.7	32.1	30.7	31.9	29.6	41	29.6
	1	13.3	18.3							23.8	30.9
	2	17.2	14.9							24.1	28.2
	3	19.1	22.9							24.2	30.5
	4	17.9	23.4							29	31.6
	5	20.9	16.4							26.3	34
	6	17	21.4							24	41.1
	7	9.23	16.3							26.7	34.3
	9	18.3	12.5							24.6	25
	11	13.2	20.1							21.1	39
	13	21	14.5							19.9	35.4
		OB								BM
gd Lung	control	42.3	36.7	56.3	36.9	18.6	38.4	41.3	18.2	43.9	47.6	45.2	41.7	55.5	45.2	72.7	65.4
	1	42.9	38.5							78.2	71.5
	2	33.9	28.8							76.1	48.1
	3	37.4	42							41.9	44.5
	4	35.4	32.2							34.3	46
	5	30.4	21.6							46.8	56
	6	30.4	49.8							46.5	47
	7	28.6	22.8							39.2	39
	9	38.1	42.8							36.3	14.1
	11	43.9	35.1							32.4	43.7
	13	36.1	25							39.1	51.9
		OB								BM
gd TBLN	control	17.5	16.8	17.7	22.7	16	16.8	18.8	7.52	14.8	12.2	14.8	8.66	23	18.8	18.2	17.2
	1	6.7	15.8							25	20.6
	2	18.2	10.9							17.2	19.4
	3	24.9	22.9							22.1	20.9
	4	14.9	15.3							19.1	40.3
	5	13.1	16.1							17.1	21.6
	6	16.9	14.4							19.9	20.6
	7	17.4	10.7							15.2	19.3
	9	14.1	8.46							13.2	16.6
	11	18	15.9							16.8	13.9
	13	9.2	13.4							16.5	14.9
		OB								BM
gd PBMC	control			64.1	54	26.8	35	42.3	16	51.2	37.4	48.3	52.2		58.7	62.1	53.1
	1	44.9	42.8							66.9	75.7
	2	31.2	30.2							75.8	55.5
	3	42.5	46.8							53.4	64.1
	4	38.6	41.4							48.5	62.2
	5	35.6	26.1							51.8	63.3
	6	52.3	47.5							45.3	48.8
	7	34.1	21.2							44.3	55.5
	9	33.2	41.6							42.6	52.1
	11		32.5							46	39.1
	13	41.9	19.9							43.8	58.8

## Sheet: Fig 2A and B ELISPOT 
values are frequency of IFNg producing cells /1e6 cells
			DPI
BAL			1	2	3	4	5	6	7		9		11		13	14			20	21
	OB1	OB	0	0	0	0	0	36.6667	1.66667		86.6667		18.3333		230
	OB2		0	0	2.66667	0	0	0	5.33333		98.6667		190.667		81.3333
	BM1	BM	0	0	0	0	0	36.6667	1.66667		86.6667		18.3333		230
	BM2		0	0	2.66667	0	0	0	5.33333		98.6667		190.667		81.3333
	BM3							215	60						560	230			117.5	942.5
	BM3							12.5	322.5						1022.5	322.5			1622.5	170
	BM3							0	300						490	465			1117.5	535
Lung			1	2	3	4	5	6	7		9		11		13	14			20	21
	OB1	OB	54.6667	0	61.3333	0	0	1.33333	0		0		0		181.333
	OB2		153.333	38.6667	282.667	101.333	73.3333	106.667	174.667		292		296		290.667
	BM1	BM	0	0	18	6	0	0	0		422		194
	BM2		38	0	6	0	0	0	6		46		10		118
	BM3							473.333	260						930	786.667			890	433.334
	BM3							550	250						643.333	90			1013.33	1336.67
	BM3								116.667						563.334	230			206.667	1146.67
TBLN			1	2	3	4	5	6	7		9		11		13	14			20	21
	OB1	OB	0	0	0	0	5.33333	13.3333	24		464		36		462.667
	OB2		0	37.3333	18.6667	9.33333	13.3333	57.3333	157.333		33.3333		561.333		24
	BM1	BM	0	0	0	0	0	98	490		694		984		478
	BM2		0	2	18	78	0	178	556		368		164		50
	BM3							56	894						750	24			1034	966
	BM3							234	552						1224	548			448	920
	BM3							286	650						674	154			24	244
PBMC			1	2	3	4	5	6	7		9		11		13	14			20	21
	OB1	OB	0	0	1.33333	0	36	72	57.3333		268		72		721.333
	OB2		10.6667	0	9.33333	70.6667	138.667	62.6667	92		308		389.333		172
	BM1	BM	0	0	0	28	0	0	0		0		26		80
	BM2		0	74	0	0	26	134	30		192		0		42
	BM3							164	28						366	144			244	66
	BM3							222	292						470	134			332	366
	BM3							198	100						224	176			146	448

## Sheet: Fig 2C and D Tetramer 
	data show tetramer postive/ CD8b+ following deduction of control tetramer
BAL			1	2	3	4	5	6	7		9		11		13	14			20	21
	OB1	OB	no tetramer data In OB
	OB2
	BM1	BM	0	0.088			0	0.58	1		3.44		3.949		3.014
	BM2		0	0	0	0	0	0.3	2.34		4.59		2.08		1.983
	BM3								0.68						2.1	1.82			0.91	2.07
	BM3							0.57	0.25						2.31	1.79			1.61	1.4
	BM3							1.05	2.32						2.51	1.94			2.73	1.03
Lung			1	2	3	4	5	6	7		9		11		13	14			20	21
	OB1	OB	no tetramer data In OB
	OB2
	BM1	BM	0	0	0	0	0	0.35	0.46		3.13		0.19		2.28
	BM2		0	0	0.1	0	0	0.06	2.25		0.43		2.09		0.33
	BM3							0	0.96						1.71	2.28			2.42	1.29
	BM3							0.69							1.47	0.26			1.54	2.34
	BM3							0.24							1.19	2.94				2.25
TBLN			1	2	3	4	5	6	7		9		11		13	14			20	21
	OB1	OB	no tetramer data In OB
	OB2
	BM1	BM	0.01	0	0.13	0.14	0.04	0.21	0.308		0.91		0.683		0.402
	BM2		0.16	0	0.116	0	0.31	0.21	0.23		0.42		0.609		0.302
	BM3							0.16	0.35						0.71	0.97			0.55	0.59
	BM3							0	0.35						0.55	0.11			0.1	0.2
	BM3								0.25						0.69				0.32	0.7
		1	2	3	4	5	6	7		9		11		13	14			20	21
TBLN	OB1	OB	no tetramer data In OB
	OB2
	BM1	BM	0	0.022	0.029	0.005	0.038	0.091	0.142		0.055		0.133		0.003
	BM2		0.084	0.029	0.025	0.038	0.071	0.25	0.086		0.06		0.073		0.035
	BM3							0.13	0.011						0.044	0.041			0.084	0
	BM3							0.09	0						0	0.022			0.065	0.001
	BM3							0.16	0.027						0.174				0.011	0.022

## Sheet: Fig 3 CD8 T cells response 
Values indicate frequency of CD8 positive cells which were positive for the indicated cytokine following subtraction of unstimulated control
			Control				DPI
IFNg BAL	OB1	OB	0			Day:	1	2	3	4	5	6	7		9		11		13	14			20	21
			0		OB1	OB	0.069	0.098	0.024	0.082	0	0.571	4.62		2.201		0.661		3.032
			0.04		OB2		0.039	0	0.074	0.397	0.068	1.539	6.95		10.016		1.12314		0.30591
			0		BM1	BM	0.026	0.02	0.19	0	0.03	0.67	1.576		10.581		15.686		13.3212
	OB2		0.016		BM2		0.07	0	0.147	0	0	1.574	1.64		9.09426		11.931		10.4578
			0.6		BM3							4.318	1.47359						11.383	0.32			2.34945	8.91859
			0.04		BM3							2.581	1.409						1.317	2.63144			0.6257	2.37548
			0		BM3							1.332	3.642						4.82415	7.85985			2.5044	3.428
	BM1	BM	0.207
			0
			0.2
			0.006
	BM2		1.746
			0.049
			0.1
			0.196
	BM3		0.041
			0.039
			0.036
			0.54
			0
			0.024
			control			Day:	1	2	3	4	5	6	7		9		11		13	14			20	21
IL-2 BAL	OB1	OB	0.469		OB1	OB	0.323	0.25	0.15	0	0	0.011	1.03		0.351		0.58		1
			0.11		OB2		0.053	0.09	0.16	0.407	0.13	0.382	0.954		0.629		0.17		0.07582
			0.03		BM1	BM	0		0.46	0	0	0.242	0.066		1.477		3.33		2.36116
			0.22		BM2					0	0.48	0.521	1.255		0.54926		1.311		1.52462
	OB2		0.096		BM3							0.897	0.198						2.16246	0.168			0.47945	1.226
			0.09		BM3							0.655	1.354						0.17416	0.1525			0.21997	0.27329
			0.037		BM3							0.307	0.866						1.062	0.75836			0.35411	0.63038
			0
	BM1	BM	0
			0.8
			0.07
			0.17
	BM2		0.14
			0.049
			0.542
			0.23
	BM3		0.314
			0.43
			0.82904
			0.769
			0
			0.6
TNF BAL			Control			Day:	1	2	3	4	5	6	7		9		11		13	14			20	21
	OB1	OB	0.049		OB1	OB	0.069	0.098	0.073	0	0.062	0.171	2.72		2.48		0.531		2.676
			0.02		OB2		0.07	0	0	0.397	0.033	0.71	6.577		7.955		0.962		0.44691
			0.002		BM1	BM	0.311	0.02	0.38	0.14	0.015	0.982	2.116		10.694		17.216		13.2492
			0.077		BM2					0	0	1.382	1.835		8.36926		11.84		9.62681
	OB2		0		BM3							3.378	1.53874						10.9435	0.41			3.0036	8.401
			0.026		BM3							1.948	1.218						1.47344	2.42298			0.84297	2.10953
			0.087		BM3							1.372	4.368						5.28394	6.26964			3.383	4.03238
			0.002
	BM1	BM	0.247
			0.74
			0.1
			0.006
	BM2		0.07457
			0.099
			0.152
			0.066
	BM3		0.06
			0.023
			0.00904
			0.529
			0.121
			0.061
IFNg Lung			Control			Day:	1	2	3	4	5	6	7		9		11		13	14			20	21
	OB1	OB	0		OB1	OB	0.019	0.00211	0.028	0.02	0.006	1.04	1.39		0.12		3.53		0.219
			0.059		OB2		0	0.033	0.00897	0.02544	0.066	0.192	0.438		0.30968		1.01831		0.05
			0.025		BM1	BM	0	0.15	0.007	0.241	0.499	0.62	0.558		3.817		0.326		4.35303
			0		BM2				0.1	0.069	0.052	0.221	2.805		0.892		0.389		0.64
	OB2		0.05573		BM3							0.584	1.364						1.469	0.93773			0.53059	1.08
			0		BM3							1.45	1.48						1.298	0.58			1.03158	0.62428
			0.11168		BM3							1.499	0.874						1.167	1.548			0.661	0.567
			0.07517
	BM1	BM	0
			0.111
			0.246
	BM2		0.04
			0.149
			0.151
	BM3		0.009
			0.054
			0.063
			0.031
			0.035
			0.042
IL-2 Lung			Control			Day:	1	2	3	4	5	6	7		9		11		13	14			20	21
	OB1	OB	0		OB1	OB	0	0	0	0.00036	0.04	0.084	0		0		0		0
			0		OB2		0.15	0.00041	0.07	0.11644	0.01053	0.00489	0		0.02308		0.103		0
			0.03		BM1	BM	0	0.06	0	0.06	0	0.21	0.208		0.014		0		0.03703
			0.05		BM2				0.08	0	0.01866	0.283	0.1		0.16		0		0.142
	OB2		0		BM3							0.089	0.0087						0	0.03073			0.036	0.09925
			0.04052		BM3							0.008	0						0	0.01			0	0.016
			0.07		BM3							0.038	0.032						0.074	0.00406			0.00595	0
			0
	BM1	BM	0.03
			0
			0.02
	BM2
			0.33
			0.2
	BM3		0
			0
			0.24
			0
			0.064
			0
TNF Lung			Control			Day:	1	2	3	4	5	6	7		9		11		13	14			20	21
	OB1	OB	0		OB1	OB	0.008	0.004	0	0.05836	0.006	0.084	0		0		0		0.119
			0.03		OB2		0.026	0.00041	0.045	0	0.01753	0.03389	0.187		0.17108		0.661		0.03
			0.01378		BM1	BM	0.08	0	0.052	0	0.076	0.22	0.248		1.924		0.117		1.24762
			0.02571		BM2					0	0.06104	0.066	1.365		0.442		0.396		0.396
	OB2		0.00462		BM3							0.395	0.2287						0.54	0.136			0.208	0.88925
			0.00252*		BM3							0.505	0.32						0.508	0.322			0.57	0.32528
			0.00468		BM3							0.081	0.228						0.777	0.39006			0.45195	0.258
			0.03117
	BM1	BM	0.043
			0
			0.066
			0.072
	BM2
			0
			0.089
	BM3		0
			0.032
			0
			0.068
			0
			0.002
IFN TBLN			Control			Day:	1	2	3	4	5	6	7		9		11		13	14			20	21
	OB1	OB	0		OB1	OB	0.01897	0	0	0	0	0.032	0		0.08188		0.02663
			0		OB2		0	0.00448	0	0.002	0.00606	0.053	0.0791		0.029		0.188		0
			0		BM1	BM	0.15281	0	0.02694	0	0.012	0	0.084		0.099		0.166		0.03139
			0		BM2		0.073	0.031	0.007	0.033	0.051	0.221	0.05962		0.202		0.428		0.113
	OB2		0		BM3							0.18	0.21164						0.576	0.51331			0.115	0.57531
			0		BM3							0.13496	0.23418						0.573	0			0.37907	0.937
			0		BM3							0.3266	0.31575						0.82787	0.06169			0.256	0.30838
			0.011
	BM1	BM	0.015
			0.079
			0
			0.011
	BM2		0
			0
			0
			0
	BM3		0
			0.017
			0.03505
			0.008
			0.02035
IL-2 TBLN			Control			Day:	1	2	3	4	5	6	7		9		11		13	14			20	21
	OB1	OB	0		OB1	OB	0	0	0	0	0	0	0		0.00488		0		0
			0.20754		OB2		0	0	0	0.00351	0.00606	0.31759	0.0051		0		0.012		0.00401
			0		BM1	BM	0.08	0.27	0	0	0	0.03555	0.07639		0		0.0536		0.022
			0.00764		BM2		0.02981	0	0	0	0	0	0		0		0		0.00839
	OB2		0.23		BM3							0.019	0.00424						0.011	0.11431			0	0.00731
			0.36		BM3							0.011	0						0	0			0.00307	0.011
			0		BM3							0.0106	0.00475						0.01371	0.00806			0.012	0.10138
			0
	BM1	BM	0.34
			1.36
			0
			0
	BM2		0
			0.02
			0
			0
	BM3		0
			0.16
			0
			0
TNF TBLN			Control			Day:	1	2	3	4	5	6	7		9		11		13	14			20	21
	OB1	OB	0.015		OB1	OB	0.04697	0.05	0.018	0	0.00575	0	0.00588		0.08288		0.01586		0
			0.00754		OB2		0	0.00448	0.00864	0.01692	0	0.04559	0.082		0.032		0.153		0.01801
			0.00774		BM1	BM	0.043	0.007	0.003	0.00827	0.03011	0.05155	0.00604		0.06		0.188		0.21101
			0.00764		BM2		0.249	0.31	0.01994	0	0.012	0.013	0.056		0.118		0.149		0.025
	OB2		0		BM3							0.07753	0.132						0.44	0.30331			0.09308	0.24631
			0		BM3							0.10676	0.44						0.398	0.008			0.20954	0.511
			0		BM3							0.07918	0.398						0.63571	0.03594			0.229	0.23116
			0
	BM1	BM	0.02177
			0
			0
			0.011
	BM2		0
			0.02
			0
			0
	BM3		0
			0.208
			0.008
			0.00335
			0.09889
			0.05092
IFNg PBMC			Control			Day:	1	2	3	4	5	6	7		9		11		13	14			20	21
	OB1	OB	0		OB1	OB	0	0.01041	0.00837	0.00958	0.02894	0.08587	0.22002		0.42323		0		0.56568
			0		OB2		0.01079	0.00545	0.00862	0.01241	0.09257	0.138	0.14139		0.32366		0.33902		0.011
			0		BM1	BM	0.023	0	0.009	0.006	0.041	0.023	0.126		0.23339		0.097		0.081
			0.028		BM2		0.073	0.031	0.007	0.033	0.051	0.221	0.05962		0.202		0.428		0.113
	OB2		0		BM3							0.00759	0.053						0.111	0.025			0.071	0.113
			0		BM3							0.015	0.022						0.05087	0.155			0.023	0.01
			0		BM3							0.011	0.028						0.046	0.056			0.026	0.025
			0.011
	BM1	BM	0
			0
			0.2
			0.018
	BM2		0
			0.03
			0.246
			0.038
	BM3		0.015
			0.00684
			0.06
			0
			0
			0.015
IL-2 PBMC			Control			Day:	1	2	3	4	5	6	7		9		11		13	14			20	21
	OB1	OB	0		OB1	OB	0	0	0	0	0.04	0.01787	0.01502		0		0		0.0078
			0		OB2		0.02961	0.00545	0	0.24	0.00857	0	0.004		0.03566		0.17484		0
			0		BM1	BM	0	0	0.105	0	0	0	0		0.04439		0.019		0
			0		BM2		0.26	0.21	0.2	0.27	0.05	0.18	0.16662		0.04		0.015		0
	OB2		0		BM3							0	0						0.009	0.02131			0.016	0.01641
			0		BM3							0.009	0						0	0			0	0.00966
			0		BM3							0.03	0.00926						0.024	0			0.019	0.01629
			0
	BM1	BM	0
			0
			0
			0.199
	BM2		0
			0.08
			0
			0
	BM3		0
			0.66137
			0.019
			0.036
			0.01591
			0.029
TNF PBMC			Control			Day:	1	2	3	4	5	6	7		9		11		13	14			20	21
	OB1	OB			OB1	OB	0.003	0.0078	0.00337	0.00507	0.00594	0.032	0.06		0.076		0		0.1328
					OB2		0.00261	0.01139	0.00129	0.01741	0.03214	0.042	0.0987		0.19366		0.23218		0.025
			0		BM1	BM	0.068	0	0.035	0.01	0.018	0.069	0.061		0.112		0.148		0.036
			0		BM2		0	0	0	0	0.093	0.061	0.05262		0.145		0.239		0.065
	OB2		0		BM3							0.0149	0.03908						0	0.038			0.066	0.075
			0.01737		BM3							0.028	0						0.01887	0.19228			0.092	0.024
			0.01253		BM3							0.03723	0.046						0.032	0.011			0.044	0.11529
			0.017
	BM1	BM	0.013
			0.01
			0.05
			0.015
	BM2
			0.015
			0.096
			0
	BM3		0.037
			0.01221
			0
			0
			0
			0

## Sheet: Fig 4 CD4 T cells response 
Values indicate frequency of CD4 positive cells which were positive for the indicated cytokine following subtraction of unstimulated control
							DPI
IFNg BAL			Control			Day:	1	2	3	4	5	6	7		9		11		13	14			20	21
	OB1	OB	0.015		OB1	OB	0.125	0.095	0.106	0	0.224	0.801	1.15		0.978		0.058		6.376
			0.027		OB2		0.003	0	0.011	0.207	0.127	0.261	0.319		2.995		0		0.285
			0.028		BM1	BM	0.035	0	0	0	0	0.072	0.02		1.708		1.472		0.34
			0.007		BM2					0.115	0.046	0.1	0.225		0.69056		0.367		0.972
	OB2		0		BM3							0.60688	0.05						0.4893	0.00467			0.098	0.2245
			0		BM3							0.3724	0.376						0.26351	0.03629			0.00407	0.16895
			0		BM3							0.098	0.211						0.018	0.213			0.05129	0.11105
			0
	BM1	BM	0.013
			0.008
			0.187
			0.025
	BM2		0
			0
			0
			0
	BM3		0.035
			0
			0.00882
			0.02397
			0.00899
			0.03959
IL-2 BAL			Control			Day:	1	2	3	4	5	6	7		9		11		13	14			20	21
	OB1	OB	0		OB1	OB	0.23	0.568	0.063	0.4	0.517	0.611	0.32		0.117		0		0.862
			0.116		OB2		0.003	0.02	0.057	0.087	0.024	0.018	0.297		0.503		0.102		0.087
			0.028		BM1	BM	0.035	0.067	0.04	0.04	0.256	0.264	0.03		0.737		0.48		0.165
			0.23		BM2					0.18	0.16	0.087	0.323		0.13556		0.06		0.224
	OB2		0		BM3							0.02688	0.01462						0.0443	0.016			0.039	0.0145
			0.042		BM3							0.0944	0.008						0.0417	0.001			0.013	0.01529
			0		BM3							0.01188	0.268						0.01	0.014			0.022	0.01711
			0
	BM1	BM	0.013
			0.21
			0.098
			0.053
	BM2		0.176
			0.054
			0.197
			0.388
	BM3		0.2245
			0.414
			0.01
			0.14764
			0.01297
			0.05118
TNF BAL			Control			Day:	1	2	3	4	5	6	7		9		11		13	14			20	21
	OB1	OB	0.015		OB1	OB	0.1	0.425	0.113	0.22	0.331	1.45	1.53		2.278		0.748		8.326
			0.026		OB2		0.013	0.19	0.017	0.28	0.227	0.361	0.439		2.692		0.042		0.617
			0.158		BM1	BM	0.166	0	0.04	0.27	0.089	0.188	0.04		2.712		3.44		0.878
			0.035		BM2					0.038	0.05	0.287	0.573		0.658		0.59		1.201
	OB2		0		BM3							0.23666	0.03662						0.133	0.07167			0.084	0.124
			0.042		BM3							0.2294	0.456						0.18919	0.009			0.097	0.12229
			0.08		BM3							0.09188	0.258						0.03	0.121			0.022	0.06811
			0
	BM1	BM	0.026
			0.008
			0.187
			0.028
	BM2		0.058
			0.024
			0.157
			0.386
	BM3		0
			0
			0.03882
			0.01297
			0.00559
			0.00379
IFN Lung			Control			Day:	1	2	3	4	5	6	7		9		11		13	14			20	21
	OB1	OB	0.005		OB1	OB	0.012	0	0	0.036	0.141				0				0.235
			0.024		OB2		0	0.027	0.005	0.004	0.03929	0.24139	0.04869		0.159		0.19179		0.10919
			0		BM1	BM		0.011	0.038	0.06	0	0.26336	0.25899		0.71087		0.13		0.89476
			0		BM2				0.056	0.248	0.191	0.017	0.255		0.12987		0.033		0.2885
	OB2		0.006		BM3							0.248	0.223						0.105	0.219			0.09828	0.05376
			0		BM3							0.195	0.249						0.126	0.11028			0.094	0.09544
			0.013		BM3							0.495	0.104						0.125	0.079			0.06406	0.101
			0.03986
	BM1	BM	0
			0
			0.091
	BM2
			0
			0
	BM3		0.017
			0.01731
			0
			0.0142
			0.00878
			0.03849
IL-2 Lung			Control			Day:	1	2	3	4	5	6	7		9		11		13	14			20	21
	OB1	OB	0		OB1	OB	0	0	0	2e-05	0.019		0*		0				0.21
			0		OB2		0	0	0	0	0	0	0		0		0		0
			0		BM1	BM		0.0098	0	0	0.012	0.01672	0.00599		0.00994		0.016		0.02314
			0		BM2				0.121	0.013	0	0.13	0.022		0.03887		0.011		0.01377
	OB2		0		BM3							0.111	0.05986						0.04	0.00415			0.07	0.02676
			0.00956		BM3							0	0.03655						0.16	0.13			0.05	0.00644
			0.00452		BM3							0.06	0.00551						0.05	0.016			0.02502	0
			0
	BM1	BM	0
			0
			0
			0
	BM2
			0.017
			0
	BM3		0.09953
			0.01731
			0.03428
			0.00815
			0.01966
TNF Lung			Control			Day:	1	2	3	4	5	6	7		9		11		13	14			20	21
	OB1	OB	0.028		OB1	OB	0	0	0.054	0.04102	0.05				0		0.84		0.317
			0.065		OB2		0.077	0.00975	0	0	0.00929	0.058	0.01605		0.14067		0.03691		0.05978
			0.013		BM1	BM		0.0298	0.039	0.029	0.012	0.12872	0.058		0.42493		0.176		0.15114
			0		BM2				0.066	0.062	0.028	0.003	0.137		0.13687		0.092		0.09873
	OB2		0.04864		BM3							0.121	0.11086						0.073	0.03815			0.10928	0.137
			0.04756		BM3							0.052	0.06355						0.146	0.03064			0.157	0.09844
			0.00946		BM3							0.065	0.03951						0.078	0.054			0.05305	0.06
			0.00203
	BM1	BM	0.055
			0
			0.00655
			0.047
	BM2
			0.017
			0.036
	BM3		0.00953
			0.02931
			0.041
			0.03028
			0.0543
			0.01449
IFN TBLN			Control			Day:	1	2	3	4	5	6	7		9		11		13	14			20	21
	OB1	OB	0.00405		OB1	OB	0.002894	0.047	0	0	0.001764	0	0.01408		0.051		0.06159		0
			0.005		OB2		0.00275	0	0	0.00672	0.00877	0.04409	0.02405		0.03176		0.041		0.03683
			0.00496		BM1	BM	0.02	0.01221	0.00267	0	0.00489	0.00394	0.01298		0.00632		0.031		0.04628
			0		BM2		0.02051	0.057	0	0.05326	0.004	0.03044	0.013335		0.06396		0.02707		0.01562
	OB2		0.03017		BM3							0.074981	0.024518						0.11757	0.03804			0.076951	0.05262
			0.00438		BM3							0.10793	0.19445						0.150866	0.02454			0.073876	0.10741
			0.00196		BM3							0.05976	0.07207						0.06287	0.05604			0.045031	0.074743
			0.013
	BM1	BM	0.03447
			0.047
			0
			0.00013
	BM2		0
			0
			0
			0
	BM3		0.000946
			0.000658
			0.025986
			0.03127
			0.01496
IL-2 TBLN			Control			Day:	1	2	3	4	5	6	7		9		11		13	14			20	21
	OB1	OB	0.00405		OB1	OB	0.00611	0.00965	0	0	0.003522	0	0.00918		0.06494		0.02497		0.15
			0.23		OB2		0.00275	0.0023	0	0.00344	0.00642	0.24773	0.1062		0.01687		0.08598		0.01763
			0.00678		BM1	BM	0.06764	0.00753	0.00267	0	0.00189	0.08394	0.01724		0.01504		0.026		0.07814
			0.013		BM2		0.01477	0.057	0.00357	0.01006	0.00449	0.01542	0.001335		0.01396		0.01962		0.0117
	OB2		0.01374		BM3							0.006981	0.000259						0.02057	0.03327			0.008951	0
			0.27338		BM3							0.02789	0.01618						0.007756	0.0077			0.007406	0.0025
			0.00196		BM3							0.04094	0.00074						0.00287	0.01604			0.023199	0.03059
			0
	BM1	BM	0.44568
			2.50224
			0
			0.00842
	BM2		0
			0
			0
			0
	BM3		0
			0.000918
			1.06199
			0.00227
			0.146
TNF TBLN			Control			Day:	1	2	3	4	5	6	7		9		11		13	14			20	21
	OB1	OB	0.00056		OB1	OB	0.036064	0.01516	0.00643	0	0.013514	0.023	0.03667		0.48894		0.13028		0
			0.00958		OB2		0.01381	0.0023	0	0.00644	0.00835	0.09351	0.67825		0.19776		0.77796		0.1502
			0.01464		BM1	BM	0.01064	0.00268	0	0	0.00022	0.01321	0.11886		0.20032		0.77		0.85728
			0.013		BM2		0.23777	0.347	0.01957	0.0378	0.01365	0.28598	0.600335		0.94096		0.66557		0.09
	OB2		0.06218		BM3							0.06032	0.137259						0.92106	0.43647			0.08328	0.28662
			0		BM3							0.17193	0.31245						0.81533	0.0417			0.225406	0.40241
			0.0047		BM3							0.20475	0.34207						0.51987	0.17304			0.246534	0.262623
			0
	BM1	BM	0.00401
			0.00617
			0.019
			0
	BM2		0
			0.006
			0.012
			0
	BM3		0.005746
			0.000918
			0.33125
			0
			0.11896
			0.05092
IFNg PBMC			Control			Day:	1	2	3	4	5	6	7		9		11		13	14			20	21
	OB1	OB			OB1	OB	0.00963	0.0048	0.01183	0.01936	0.21	0.18818	0.05292		0.5321		0		1.10912
					OB2		0.01357	0.00608	0.00774	0.01527	0.362	0.21019	0.05342		0.22188		0.41841		0.23
			0.01301		BM1	BM	0	0.01199	0.03908	0.059	0.11484	0.153	0.0789		0.2432		0.20047		0.1734
			0		BM2		0	0.0248	0.00336	0.06051	0.12911	0.21445	0.02023		0.25448		0.31562		0.07452
	OB2		0.03017		BM3							0.00759	0.032						0.05	0.016			0.042	0.111
			0		BM3							0	0.051						0.014	0.142			0.01955	0.02521
			0.00629		BM3							0.00494	0.02507						0.016	0.011			0.026	0.00796
			0.011924
	BM1	BM	0
			0.00317
			0
			0.01572
	BM2
			0.01996
			0.02041
			0
	BM3		0.0226
			0.00394
			0.099
			0
			0
			0
IL-2 PBMC			Control			Day:	1	2	3	4	5	6	7		9		11		13	14			20	21
	OB1	OB			OB1	OB	0	0	0	0	0	0	0		0				0
					OB2		0	0	0	0	0	0	0		0		0		0
			0		BM1	BM	0	0	0	0		0	0		0		0		0
			0		BM2		0		0	0	0.07	0	0		0		0.31		0
	OB2		0		BM3							0	0						0	0			0	0
			0		BM3							0	0						0	0			0	0
			0		BM3							0	0						0	0			0	0
			0
	BM1	BM	0.33
			0
			0
			0
	BM2
			0
			0
			0
	BM3		0
			0
			0
			0
			0
			0
TNF PBMC			Control			Day:	1	2	3	4	5	6	7		9		11		13	14			20	21
	OB1	OB			OB1	OB	0.01492	0.02286	0.03308	0.03	0.12037	0.11518	0.09003		0.32615		0		0.80775
					OB2		0.0149	0.08159	0.02374	0.03257	0.202	0.23319	0.07066		0.24894		0.53262		0.34701
			0.04362		BM1	BM	0.002	0.02558	0.08604	0.058	0.06684	0.128	0.10852		0.244		0.33247		0.18247
			0.03683		BM2		0.03886	0.01677	0.055	0.03251	0.06411	0.17267	0.01879		0.28845		0.25462		0.06117
	OB2		0.10817		BM3							0.01917	0.033						0	0.027			0.08066	0.05
			0.0287		BM3							0.026	0.006						0.027	0.185			0.07155	0.10521
			0.0194		BM3							0.02294	0.09007						0.0231	0.011			0.058	0.09696
			0.029854
	BM1	BM	0.00996
			0.02217
			0.074
			0.07203
	BM2
			0.079
			0.015
			0.05
	BM3		0.0336
			0.00394
			0
			0
			0
			0

## Sheet: Fig 5 gd ex vivo 
Values indicate frequency of TCRgd CD2 positive cells which were positive for the indicated cytokine
IFNg CD2+ ex vivo			DAYS:	1	2	3	4	5	6	7		9		11		13	14			20	21
		control
	OB1	0		0.41	0	1.12	0.23	0.54	0.78					0.93		0.59
	OB2	0.1		0.25	0.22	0.12	0.2	0.19	0.34	0.16		0.28		0.057		0.23
		0.19
	BM3	0.2							0.42	0.081						0.26	0.054			0.03	0.028
	BM3	0.15							0.19	0.69						0.13	0.04			0.07	0.098
	BM3	0.25							0.14	0.16						0.048	0.054			0.061	0
		0.13
		0.99
	BM1	0.19		0.13	0.34	0.51	0.54	0.16	0.32	0.28		0.092		0.56		0.42
	BM2	0.14		0.83	0.82	0.47	0.29	0.1	0.75	0.58		0.31		0.45		0.37
		0.27
		0.28
		0.18
		0.35
		0.098
		0.43
	BM3	0.11
	BM3	0.024
	BM3	0.086
	BM3	0.055
	BM3	0.12
	BM3	0.058
TNF CD2+ ex vivo			DAYS:	1	2	3	4	5	6	7		9		11		13	14			20	21
		control
	OB1	0.14		0.41	1.62	1.87	0.91	0.81	1.17					2.31		0.59
	OB2	0.15		0.76	0.67	0.93	1.54	0.39	1.47	0.48		1.27		1.1		0.67
		0.56
	BM3	0.61							0.86	0.19						0.32	0.16			0.089	0.14
	BM3	0.5							0.34	0.66						0.24	0.18			0.14	0.31
	BM3	1.19							0.27	0.7						0.15	0.16			0.15	0.11
		2.11
		1.48
	BM1	0.62		1.06	1.47	3.21	2.34	1.67	1.22	0.44		0.092		0.56		0.49
	BM2	0.54		0	0.68	0.59	0.57	0.51	0.56	0.87		0.63		0.3		0.49
		0.91
		0.39
		0.53
		0.95
		0.39
		0.78
	BM3	0.15
	BM3	0.17
	BM3	0.19
	BM3	0.16
	BM3	0.16
	BM3	0.2
TNF/ IFNg CD2+ ex vivo			DAYS:	1	2	3	4	5	6	7		9		11		13	14			20	21
		control
	OB1	0		0	0	0.75	0	0	0.39	0.92		0		0.47		0
	OB2	0		0.051	0.055	0.059	0.025	0.049	0.15	0		0.14		0.028		0.052
		0
	BM3	0							0.27	0.027						0.096	0.018			0	0
	BM3	0.039							0.094	0.35						0.08	0			0.023	0.039
	BM3	0.063							0.055	0.054						0.019	0			0	0
		0
		0
	BM1	0.13		0	0.11	0	0.06	0	0	0.079		0		0		0.071
	BM2	0		0	0.14	0	0	0	0	0		0		0.075		0.082
		0.11
		0
		0
		0.17
		0
		0.17
	BM3	0.018
	BM3	0
	BM3	0.034
	BM3	0
	BM3	0
	BM3	0

## Sheet: Fig 6 gd H1N1 stim 
Values indicate frequency of GD positive CD2 positive cells which were positive for the indicated cytokine following subtraction of unstimulated control
BAL IFNg		control		DAYS:	1	2	3	4	5	6	7	9	11	13	14		20	21
	OB1	0.14			0	0	0	0.18	0	0	1.11	0	0.08	1.01
	OB2	0.01			0.14	0	0.12	0.11	0.07	0	0.32	0.69	0.403	0.3
		0
	BM3	0								0.03	0.049			0	0.013		0	0.122
	BM3	0								0	0			0.08	0.018		0	0.042
	BM3	0								0	0.53			0.072	0.032		0	0.17
		0
		0
	BM1	0.12			0.02	0.18	0	0	0.07	0	0.05	0.378	0.72	0.44
	BM2	0			0	0.31	0	0	0.12	0	0	0.4	0.29	0.24
		0.03
		0
		0
		0
		0.072
		0
	BM3	0
	BM3	0.126
	BM3	0.104
	BM3	0.115
	BM3	0
	BM3	0
BAL TNF		control		DAYS:	1	2	3	4	5	6	7	9	11	13	14		20	21
	OB1	0.09			0	0	0	0	0.63	0	0	0	0	0
	OB2	0			0	0	0	0	0.42	0	0	0.31	0.65	0
		0
	BM3	0								0	0.08			0	0.03		0.101	0.13
	BM3	0								0	0			0.05	0.01		0.02	0.03
	BM3	0								0.18	0			0.06	0.17		0.05	0.17
		0
		0
	BM1	0.07			0.25	0	0	0	0	0.45	0.14	1.328	1.15	0.83
	BM2	0			0.67	0	0.77	0.05	0.07	0.42	1.22	0.31	0.83	1.11
		1.25
		0.34
		1.17
		0.78
		0.22
		0.47
	BM3	0
	BM3	0.01
	BM3	0
	BM3	0.01
	BM3	0
	BM3	0.15
BAL IL-17		control		DAYS:	1	2	3	4	5	6	7	9	11	13	14		20	21
	OB1	0			0	0	0.063	0.2	0	0.19	0	0	0.17	0.34
	OB2	0.24			0.069	0	0	0	0.271	0	0	0	0	0.01
		0.28
	BM3	0								0	0.036			0.024	0		0	0
	BM3	0								0	0.29			0	0.023		0	0
	BM3	0.01								0	0.086			0	0		0	0
		0
		0
	BM1	0.037			0	0.074	0.12	0	0.039	0	0.033	0.067	0.32	0.099
	BM2	0			0	0	0	0	0	0	0	0	0.26	0
		0.31
		0.037
		0.063
		0.163
		0.038
		0.03
	BM3	0
	BM3	0
	BM3	0
	BM3	0
	BM3	0
	BM3	0.1
BAL IFN/TNF		control		DAYS:	1	2	3	4	5	6	7	9	11	13	14		20	21
	OB1	0			0	0	0	0	0.48	0	0	0	0	0
	OB2	0.022			0	0	0.027	0.125	0.037	0	0.24	0.39	0.152	0.078
		0
	BM3	0								0	0.027			0	0.036		0.016	0.045
	BM3	0								0	0			0.02	0		0	0.028
	BM3	0								0	0.086			0.047	0.043		0.03	0.083
		0.026
		0
	BM1	0			0	0	0.12	0.04	0.093	0	0.141	0.27	0.64	0.509
	BM2	0			0	0.42	0	0.089	0.073	0	0.19	0.35	0.285	0.298
		0
		0
		0.063
		0
		0
		0
	BM3	0.052
	BM3	0.036
	BM3	0
	BM3	0.055
	BM3	0
	BM3	0.05
Lung IFNg		control		DAYS:	1	2	3	4	5	6	7	9	11	13	14		20	21
	OB1	0			0.18	0	0	0.038	0.075	0.17	1.16	0	0	0
	OB2	0			0.53	0.05	0	0.057	0	0.057	0.15	0.071	0.132	0.07
		0
	BM3	0								0	0.422			0.2	0.08		0	0
	BM3	0.078								0.21	0.37			0.55	0.084		0	0.11
	BM3	0								0.16	0.2			0	0.002		0.42	0.12
		0
		0.048
	BM1	0			0.28	0	0	0	0	0.17	0.21	0.694	0.54	1.27
	BM2	0.56			0.16	0.14	0	0.03	0	0.13	0.55	0.19	0.39	0.49
		0.18
		0.5
		0
		0.12
		0
		0.3
	BM3	0
	BM3	0.002
	BM3	0
	BM3	0
	BM3	0
	BM3	0.063
Lung TNF		control		DAYS:	1	2	3	4	5	6	7	9	11	13	14		20	21
	OB1	0			0.291	0	0.13	0	0.097	0	0	1.32		0
	OB2	0.098			0	0	0	0.095	0.01	0.062	0.12	0.041		0.36
		0.067
	BM3	0								0	0.037			0.2	0		0	0
	BM3	0.11								0.41	0.19			0.14	0		0.21	0.15
	BM3	0								0.08	0.49			0.071	0.03		0.11	0
		0.057
		0.15
	BM1	0			0	0	0	0	0.46	0	0.03	0.99		0.44
	BM2	0			0	0	0	0	0.16	0.18	0.32	0.19		0.08
		0.33
		0
		0
		0
		0
		0
	BM3	0
	BM3	0.23
	BM3	0
	BM3	0.073
	BM3	0
	BM3	0
Lung IL-17		control		DAYS:	1	2	3	4	5	6	7	9	11	13	14		20	21
	OB1	0			0	0	0.032	0.076	0	0	0		0	0
	OB2	0			0	0	0	0	0	0	0.017	0.019	0.049	0.09
		0
	BM3	0								0	0			1.57	0		0	0.28
	BM3	0.016								0	0			0	0		0	0.33
	BM3	0								0	0.099			0.071	0		0.11	0
		0.019
		0
	BM1	0			0	0	0	0	0	0	0	0	0.049	0
	BM2				0.11	0.14	0.071	0	0	0.092	0	0	0.16	0
		0.088
		0
		0.22
		0
		0
		0
	BM3	0
	BM3	0
	BM3	0
	BM3	0
	BM3	0
	BM3	0
Lung IFNg/TNF		control		DAYS:	1	2	3	4	5	6	7	9	11	13	14		20	21
	OB1	0			0	0	0.032	0	0	0	0	0	0	0
	OB2	0			0	0	0	0.04	0	0.038	0	0.056	0.07	0.18
		0.036
	BM3	0								0	0			0	0.013		0	0
	BM3	0.031								0	0.19			0	0		0.051	0.11
	BM3	0								0	0.2			0.071	0		0.035	0.019
		0.019
		0
	BM1	0			0	0	0	0.03	0	0.07	0	0.104	0.15	0.24
	BM2	0			0	0	0	0	0	0	0.079	0	0.16	0.16
		0.11
		0.17
		0
		0.058
		0
		0
	BM3	0
	BM3	0.05
	BM3	0
	BM3	0
	BM3	0
	BM3	0.031
TBLN IFNg		control		DAYS:	1	2	3	4	5	6	7	9	11	13	14		20	21
	OB1	0.14			0.031		0.017	0.09	0	0	0.05	0.15	0	0
	OB2	0.03			0.2	0.055	0.1	0	0.055	0	0.03	0	0.057	0.02
		0
	BM3	0.009								0.11	0.445			0.273	0.17		0.23	0.01
	BM3	0								0.11	0.21			0.12	0		0	0.01
	BM3	0.01								0.197	0.5			0.11	0.59		0.15	0
		0.01
		0.172
	BM1	0			0	0	0	0.02	0.011	0	0	0.129	0	0
	BM2	0			0.01		0	0	0.06	0.019	0.054	0	0.151	0.09
		0
		0.047
		0
		0
		0
		0
	BM3
	BM3	0
	BM3	0.1
	BM3	0.096
	BM3	0
	BM3
TBLN TNF		control		DAYS:	1	2	3	4	5	6	7	9	11	13	14		20	21
	OB1	0			0.08	0.054	0	0	0	0	0	0.073		0
	OB2	0.01			0	0	0	0	0.031	0.019	0.049	0.108		0.011
		0.005
	BM3	0								0.079	0.285			0.17	0.112		0.25	0.21
	BM3	0								0.11	0.2			0.33	0		0	0
	BM3	0								0	0.59			0.038	0.304		0	0
		0
		0
	BM1	0.043			0	0	0	0.025	0	0.044	0.06	0.155		0.2
	BM2	0			0.169	0	0.026	0	0.005	0.062	0.08239	0.12		0
		0.04
		0
		0.025
		0.026
		0.01
		0
	BM3
	BM3	0
	BM3	0.73
	BM3	0.096
	BM3	0
	BM3
TBLN IL-17		control		DAYS:	1	2	3	4	5	6	7	9	11	13	14		20	21
	OB1	0.081			0.018	0	0	0.028	0	0.1	0	0.009	0	0.013
	OB2	0.149			0.05	0.018	0.029	0.009	0	0.02	0.079	0	0.066	0
		0
	BM3	0.075								0.199	0.16			0.273	0		0.23	0
	BM3	0								0	0.07			0.22	0.75		0	0.12
	BM3	0.095								0.277	0			0.038	0		0	0.156
		0.021
		0.067
	BM1	0.17			0.061	0	0.12	0	0	0	0.07	0	0.031	0
	BM2	0.29			0.099	0	0	0	0	0.002	0.003	0.064	0	0.028
		0.14
		0
		0
		0
		0
		0.044
	BM3
	BM3	0.09
	BM3	0
	BM3	0.38
	BM3	0
	BM3
TBLN IFNg/TNF		control		DAYS:	1	2	3	4	5	6	7	9	11	13	14		20	21
	OB1	0			0	0	0	0	0	0	0	0.003	0	0
	OB2	0			0	0	0	0	0	0.015	0	0	0	0
		0
	BM3	0								0	0			0.17	0		0.12	0
	BM3	0								0.11	0.2			0	0		0	0
	BM3	0								0	0.07			0	0		0	0
		0
		0
	BM1	0			0	0	0	0.00222	0	0.015	0.013	0	0.031	0
	BM2	0			0	0	0	0	0	0.016	0	0.017	0.024	0
		0
		0
		0.013
		0
		0
		0
	BM3
	BM3	0
	BM3	0
	BM3	0
	BM3	0
	BM3
PBMC IFNg		control		DAYS:	1	2	3	4	5	6	7	9	11	13	14		20	21
	OB1	0			0	0.08	0	0.15	0.22	0	0.02	0	0	0.1
	OB2	0			0.06	0	0.12	0.03	0.04	0.01	0	0.19	0.57	0.95
		0
	BM3	0								0	0.029			0.096	0.131		0	0
	BM3	0								0.012	0.015			0	0.01659		0	0
	BM3	0.02								0.016	0.056			0.055	0.035		0.069	0.176
		0.01
		0.21
	BM1	0			0.06	0.03	0	0.109	0.043	0.01	0	0.23	0.241	0.182
	BM2	0.04			0.25	0.18	0.12	0	0.12	0.17	0.15	0.04	0.38	0.05
		0.37
		0.15
		0
		0.42
		0.26
		0.12
	BM3	0.12
	BM3	0.01
	BM3	0.039
	BM3	0.047
	BM3	0.076
	BM3	0
PBMC TNF		control		DAYS:	1	2	3	4	5	6	7	9	11	13	14		20	21
	OB1				0.007	0.004	0.033	0.059	0	0.043	0	0		0.002
	OB2				0	0.081	0	0.022	0.018	0.073	0.173	0.072	0.071	2.64
		0
	BM3	0								0	0			0.048	0.066		0.107	0
	BM3	0								0	0.05			0.04	0.007		0.031	0.018
	BM3	0.013								0.026	0.083			0.042	0.01		0.13	0.266
		0.037
		0
	BM1	1.868			0.096	0.196	0.05	0.018	0.201	0	0	0.053	0.137	0
	BM2	0			0.004	0	0	0.1	0.007	0	0	0.067	0.146	0
		0
		0.22
		0.09
		0
		0.051
	BM3	0.021
	BM3	0
	BM3	0.171
	BM3	0.018
	BM3	0.011
	BM3	0.004
PBMC IL-17		control		DAYS:	1	2	3	4	5	6	7	9	11	13	14		20	21
	OB1				0	0	0.017	0.096	0.11	0	0	0		0.002
	OB2				0.015	0.062	0	0.037	0	0	0	0	0.087	0
		0
	BM3	0								0	0.06			0.015	0		0	0
	BM3	0								0	0			0.028	0.018		0.009	0
	BM3	0								0	0			0.022	0		0	0.00827
		0
		0
	BM1	0.53			0	0.096	0	0	0.16	0	0	0.068	0	0
	BM2	0			0	0.053	0.014	0.22	0	0	0	0.004	0	0.25
		0
		0
		0
		0.03
		0
	BM3	0
	BM3	0.01
	BM3	0
	BM3	0
	BM3	0
	BM3	0.023
PBMC IFNg/TNF		control		DAYS:	1	2	3	4	5	6	7	9	11	13	14		20	21
	OB1				0	0	0	0	0	0.058	0.029	0		0.026
	OB2				0	0.018	0	0	0	0.018	0.058	0.05	0	0.11
		0
	BM3	0								0	0			0	0.04		0	0
	BM3	0								0	0.014			0.011	0		0	0.038
	BM3	0								0.013	0.028			0	0.012		0.038	0.068
		0.00857
		0.015
	BM1	0			0	0	0.012	0	0.012	0	0.015	0.034	0.029	0
	BM2	0			0	0	0	0	0.025	0.014	0	0.032	0.072	0.029
		0.033
		0.036
		0
		0.03
		0.013
		0
	BM3	0
	BM3	0
	BM3	0.039
	BM3	0
	BM3	0
	BM3	0

## Sheet: Fig 7A H1N1 ELISA 
Serum		IgG	DPI
			1	2	3	4	5	6	7	9	11	13	14	20	21
		Outbred 1	0	0	0	0	0	0	2560	20480	20480	10240
		Outbred 2	0	0	0	0	0	20	20	80	5120	5120
		Babraham 1	0	0	0	0	0	20	640	2560	5120	10240
		Babraham 2	0	0	0	0	0	0	5120	2560	10240	20480
		Babraham 3						20	20			10240	10240	10240	10240
								20	0			10240	20480	20480	5120
								20	80			20480	10240	10240	10240
		IgA	DPI
			1	2	3	4	5	6	7	9	11	13	14	20	21
		Outbred 1	0	0	0	0	0	20	640	1280	2560	2560
		Outbred 2	0	0	0	0	0	20	20	20	320	320
		Babraham 1	0	0	0	0	0	20	20	160	40	80
		Babraham 2	0	0	0	0	0	0	1280	640	160	160
		Babraham 3						20	0			320	320	640	40
								20	320			640	320	20	20
								20	80			1280	20	320	20
		Serum Flu ELISA End Titres (plates coated with H1N1pdm09)
		End titre defined as the highest serum dilution with OD450 signal greater than cut-off
		Serum was diluted as 1:2 dilution series starting at 1:20 dilution
		The 1:20 starting dilution was chosen by initial titration of naïve samples, more concentrated serum produced pronounced background and less concentrated serum limited early timepoint detection
		Cut off is defined as the average OD450 signal + 3x Standard deviation from pig matched naïve serum samples (technical replicates) at 1:20 serum dilution
		Pig matched naïve samples available for all time points and pigs.
		Outbred 1+2 had one pig at each timepoint
		Babraham 1+2 had one pig at each timepoint
		Babraham 3 had three pigs at each timepoint
BAL		IgG	DPI
			1	2	3	4	5	6	7	9	11	13	14	20	21
		Outbred 1	0	0	0	0	0	8	32	64	4096	2048
		Outbred 2	0	0	0	0	0	0	0	16	512	4096
		Babraham 1	0	0	0	0	0	0	2	16	64	512
		Babraham 2	0	0	0	0	4	4	8	8	128	8192
		Babraham 3						16	0			512	1024	512	2048
								2	32			256	512	8192	1024
								0	128			1024	1024	2048	512
		IgA	DPI
			1	2	3	4	5	6	7	9	11	13	14	20	21
		Outbred 1	0	0	0	0	0	4	16	32	4096	4096
		Outbred 2	0	0	0	0	0	0	0	32	512	2048
		Babraham 1	0	0	0	0	2	2	8	8	256	128
		Babraham 2	0	0	0	0	2	0	8	32	128	8192
		Babraham 3						0	32			2048	1024	1024	1024
								0	32			512	2048	16384	1024
								0	64			1024	2048	2048	256
		BAL Flu ELISA End Titres (plates coated with H1N1pdm09)
		End titre defined as the highest serum dilution with OD450 signal greater than cut-off
		BAL was diluted as 1:2 dilution series starting at 1:2 dilution
		The 1:2 starting dilution was chosen by initial titration of naïve samples, more concentrated serum produced pronounced background and less concentrated serum limited early timepoint detection
		Cut off is defined as the average OD450 signal + 3x Standard deviation naïve BAL samples (n=4) at 1:2 dilution
		Outbred 1+2 had one pig at each timepoint
		Babraham 1+2 had one pig at each timepoint
		Babraham 3 had three pigs at each timepoint
NS		IgG	DPI
Babraham 3			1	2	3	4	5	6	7	8	9
		Pig 1	0	0	0	0	0	4	8	64	64
		Pig 2	0	4*	0	0	0	0	0	4	16
		Pig 3	0	4*	4*	0	0	8	4	8	8
		Pig 4	0	0	0	0	0	4	128	128	128
		Pig 5	0	0	0	0	0	0	0	8	8
		Pig 6	0	0	0	0	0	0	4	64	64
NS		IgA	DPI
Babraham 3			1	2	3	4	5	6	7	8	9
		Pig 1	4*	0	0	4*	0	4	16	128	32
		Pig 2	0	0	0	0	4*	8	64	8	32
		Pig 3	0	4*	0	0	0	8	16	64	16
		Pig 4	0	0	0	0	0	0	4	16	16
		Pig 5	0	0	0	0	0	4	4	16	8
		Pig 6	0	0	4*	0	0	4	16	64	64
		Nasal swab Flu ELISA End Titres (plates coated with H1N1pdm09)
		End titre defined as the highest serum dilution with OD450 signal greater than cut-off
		NS was diluted as 1:2 dilution series starting at 1:4 dilution
		Cut off is defined as the average OD450 signal + 3x Standard deviation naïve NS samples (n=6) at 1:4 dilution

## Sheet: Fig 7B HA ELISA 
Serum		IgG	DPI
			1	2	3	4	5	6	7	9	11	13	14	20	21
		Outbred 1	20	0	0	0	0	0	40	1280	2560	640
		Outbred 2	0	0	0	20	0	20	320	640	1280	640
		Babraham 1	0	0	0	20	0	20	40	160	640	1280
		Babraham 2	0	0	0	0	20	40	640	320	320	0
		Babraham 3						0	0			2560	80	1280	1280
								0	80			80	160	640	1280
								0	40			160	160		320
		IgA	DPI
			1	2	3	4	5	6	7	9	11	13	14	20	21
		Outbred 1	0	0	0	0	0	0	160	640	80	160
		Outbred 2	0	0	0	0	0	20	160	160	1280	160
		Babraham 1	0	0	0	0	0	20	80	320	320	80
		Babraham 2	0	0	0	0	0	0	40	40	80	40
		Babraham 3						0	40			640	40	640	320
								0	40			80	160	80	320
								0	20			320	80		160
		Serum HA ELISA End Titres (plates coated with pHA)
		End titre defined as the highest serum dilution with OD450 signal greater than cut-off
		Serum was diluted as 1:2 dilution series starting at 1:20 dilution
		The 1:20 starting dilution was chosen by initial titration of naïve samples, more concentrated serum produced pronounced background and less concentrated serum limited early timepoint detection
		Cut off is defined as the average OD450 signal + 3x Standard deviation from pig matched naïve serum samples (technical replicates) at 1:20 serum dilution
		Pig matched naïve samples available for all time points and pigs.
		Outbred 1+2 had one pig at each timepoint
		Babraham 1+2 had one pig at each timepoint
		Babraham 3 had three pigs at each timepoint
BAL		IgG	DPI
			1	2	3	4	5	6	7	9	11	13	14	20	21
		Outbred 1	16	0	0	0	0	256	8	16	256	32
		Outbred 2	0	0	0	0	0	0	0	0	2	2
		Babraham 1	0	0	0	0	0	0	0	0	2	1024
		Babraham 2	0	0	8	8	8	8	256	16	0	0
		Babraham 3						32	2			512	0	64
								2				32	32	256
								2	32			32	64	128
		IgA	DPI
			1	2	3	4	5	6	7	9	11	13	14	20	21
		Outbred 1	0	0	0	0	0	0	4	32	64	256
		Outbred 2	0	0	0	0	0	0	4	8	32	32
		Babraham 1	0	0	0	0	0	2	4	16	128	256
		Babraham 2	0	0	0	0	4	0	4	4	0	32
		Babraham 3						8	8			512	0	64	32
								0	8			32	32	64	32
								0	2			128	64	256	0
		BAL HA ELISA End Titres (plates coated with pHA)
		End titre defined as the highest serum dilution with OD450 signal greater than cut-off
		BAL was diluted as 1:2 dilution series starting at 1:2 dilution
		The 1:2 starting dilution was chosen by initial titration of naïve samples, more concentrated serum produced pronounced background and less concentrated serum limited early timepoint detection
		Cut off is defined as the average OD450 signal + 3x Standard deviation naïve BAL samples (n=4) at 1:2 dilution
		Outbred 1+2 had one pig at each timepoint
		Babraham 1+2 had one pig at each timepoint
		Babraham 3 had three pigs at each timepoint
NS		IgG	DPI
Babraham 3			1	2	3	4	5	6	7	8	9
		Pig 1	0	0	0	0	0	0	0	0	0
		Pig 2	0	0	0	0		0	0	4	0
		Pig 3	0	0	0	0		0	0	4	0
		Pig 4	0	0	0	0	0	0	0	4	0
		Pig 5	0	0	0	0	0	0	0	0	0
		Pig 6	0	0	0	0	0	0	0	8	4
NS		IgA	DPI
Babraham 3			1	2	3	4	5	6	7	8	9
		Pig 1	0	0	0	0	0	0	0	8	4
		Pig 2	0	0	0	0	0	0	0	4	0
		Pig 3	0	0	0	0	0	4	0	16	4
		Pig 4	0	0	0	0	0	0	0	4	0
		Pig 5	0	0	0	0	0	0	0	0	0
		Pig 6			0	0	0	0	4	32	16
		Nasal swab HA ELISA End Titres (plates coated with pHA)
		End titre defined as the highest serum dilution with OD450 signal greater than cut-off
		NS was diluted as 1:2 dilution series starting at 1:4 dilution
		Cut off is defined as the average OD450 signal + 3x Standard deviation naïve NS samples (n=6) at 1:4 dilution

[truncated: 8 more sheets: Fig 8A MN , Fig 8A HAI  , Fig 8A ELLA , Supp Fig 1A CD8 TCRgd freq, Supp Fig 2B IFNg MFI  , Supp Fig 3 percentage cytokine , Supp Fig 5 contact animals , Supp Fig 6 contact animals gd ]
